# Supplementary material for: A discontinuous DNA glycosylase domain in a family of enzymes that excise 5-methylcytosine
Source: PubMed Central journal article supplement — Nucleic Acids Res. 2010 Oct 29;39(4):1473–84. doi: 10.1093/nar/gkq982 (PMC3045615; doi:10.1093/nar/gkq982), 2010-10-29
Supplement: supp_gkq982_gkq982_Suppl_data.pdf [file supp_gkq982_gkq982_Suppl_data.pdf]

## **Supplemental material for:**

### **A discontinuous DNA glycosylase domain in a family of enzymes that excise 5-methylcytosine**

María Isabel Ponferrada-Marín, Jara Teresa Parrilla-Doblas, Teresa Roldán-Arjona and Rafael R. Ariza

*Department of Genetics, University of Córdoba, Spain*

Table S1  
Table S2  
Figure S1  
Figure S2  
Figure S3  
Figure S4  
Figure S5  
Figure S6  
Figure S7

**Table S1. Oligonucleotides used as substrates**

| Name     | DNA Sequence                                                        | Strand | X=    |
|----------|---------------------------------------------------------------------|--------|-------|
| FL-CGF   | 5'-TCACGGGATCAATGTGTTCTTTCAGCT <b>CXGG</b> TCACGCTGACCAGGAATACC-3'  | Upper  | C     |
| FL-meCGF | 5'-TCACGGGATCAATGTGTTCTTTCAGCT <b>CXGG</b> TCACGCTGACCAGGAATACC-3'  | Upper  | 5-meC |
| FL-TGF   | 5'-TCACGGGATCAATGTGTTCTTTCAGCT <b>CXGG</b> TCACGCTGACCAGGAATACC-3'  | Upper  | T     |
| FL-HUGF  | 5'-TCACGGGATCAATGTGTTCTTTCAGCT <b>CXGG</b> TCACGCTGACCAGGAATACC-3'  | Upper  | 5-HU  |
| FL-UGF   | 5'-TCACGGGATCAATGTGTTCTTTCAGCT <b>CXGG</b> TCACGCTGACCAGGAATACC-3'  | Upper  | U     |
| FL-BrC   | 5'-TCACGGGATCAATGTGTTCTTTCAGCT <b>CXGG</b> TCACGCTGACCAGGAATACC-3'  | Upper  | 5-BrC |
| FL-BrU   | 5'-TCACGGGATCAATGTGTTCTTTCAGCT <b>CXGG</b> TCACGCTGACCAGGAATACC-3'  | Upper  | 5-BrU |
| Fl-MCGF  | 5'-TCACGGGATCAATGTGTTCTTTCAGCT <b>CXGG</b> TCACGCTGACCAGGAATACC-3'  | Upper  | 5-meC |
| CGR      | 3'-AGTGCCCTAGTTACACAAGAAAGTCGA <b>GGXC</b> AGTGCGACTGGTCCTTATGG-5'  | Lower  | C     |
| FL-MXF   | 5'-TCACGGGATCAATGTGTTCTTTCATAT <b>AXTA</b> TAACGCTGACCAGGAATACC-3'  | Upper  | 5-meC |
| CXR      | 3'-AGTGCCCTAGTTACACAAGAAAGTCTA <b>TGAT</b> AGTGCGACTGGTCCTTATGG-5'  | Lower  | -     |
| FL-MAGF  | 5'-TCACGGGATCAATGTGTTCTTTCAGCT <b>CXAGG</b> TCACGCTGACCAGGAATACC-3' | Upper  | 5-meC |
| CAGR     | 3'-AGTGCCCTAGTTACACAAGAAAGTCGA <b>GGTXC</b> AGTGCGACTGGTCCTTATGG-5' | Lower  | C     |
| A1-28P   | 5'-TCACGGGATCAATGTGTTCTTTCAGCTC-3'                                  | Upper  | -     |
| P30_51   | 5'-GGTCACGCTGACCAGGAATACC-3'                                        | Upper  | -     |

<sup>a</sup>Relevant regions are boxed.

**Table S2. Oligonucleotides used as primers for generation of ROS1 mutant variants**

| Name          | Sequence (5' - 3') <sup>a</sup>                       |
|---------------|-------------------------------------------------------|
| ROS1Q584L-F   | GGATGCACCTTGTACT <u>AG</u> GGGATCGACGTTTTACGCCTTG     |
| ROS1Q584L-R   | CAAGGCGTAAACTGCGATCCCCT <u>AGT</u> TACAAGGTGCATCC     |
| ROS1F589A-F   | AGGGGATCGACGT <u>GCT</u> ACGCCTTGGAAGGG               |
| ROS1F589A-R   | CCCTTCCAAGGCGT <u>AGC</u> ACGTCGATCCCCT               |
| ROS1T606L-F   | GTATTTCTCCTTCAAATGTTTCAGACCATCTCTCAAGTTCGGC           |
| ROS1T606L-R   | GCCGAACCTGAGAGATGGTCTGAAACATTTT <u>GAA</u> GGAGAAATAC |
| ROS1Q607A-F   | GGAGTATTTCTCACT <u>GCA</u> AATGTTTCAGACCATCTCTCAAG    |
| ROS1Q607A-R   | CTTGAGAGATGGTCTGAAACATTT <u>GCA</u> GTGAGAAATACTCC    |
| ROS1N608A-F   | GTATTTCTCACTCAAG <u>CT</u> GTTTCAGACCATCTCTCAAGTTCG   |
| ROS1N608A-R   | CGAACTTGAGAGATGGTCTGAAAC <u>AGCT</u> TGAGTGAGAAATAC   |
| ROS1D611V-F   | TCTCACTCAAATGTTTCAGT <u>CC</u> ATCTCTCAAGTTCGG        |
| ROS1D611V-R   | CCGAACCTGAGAGATGG <u>ACT</u> GAAACATTTTGAGTGAGA       |
| ROS1W1012A-F  | TGAATCTATTCAAAGTATCTT <u>GCG</u> CCCCGTCTCTGC         |
| ROS1W1012A -R | GCAGAGACGGGG <u>CGCA</u> AGATACTTTTGAATAGATTCA        |
| ROS1Y1028S-F  | CATTGTATGAGTTGCACT <u>CCC</u> CAGATGATTACTTTTGAAAGG   |
| ROS1Y1028S -R | CCTTTCCAAAAGTAATCATCTG <u>GGAG</u> TGCAACTCATACAATG   |

<sup>a</sup>Underlining indicates the mutagenized codon.

## FIGURE S1

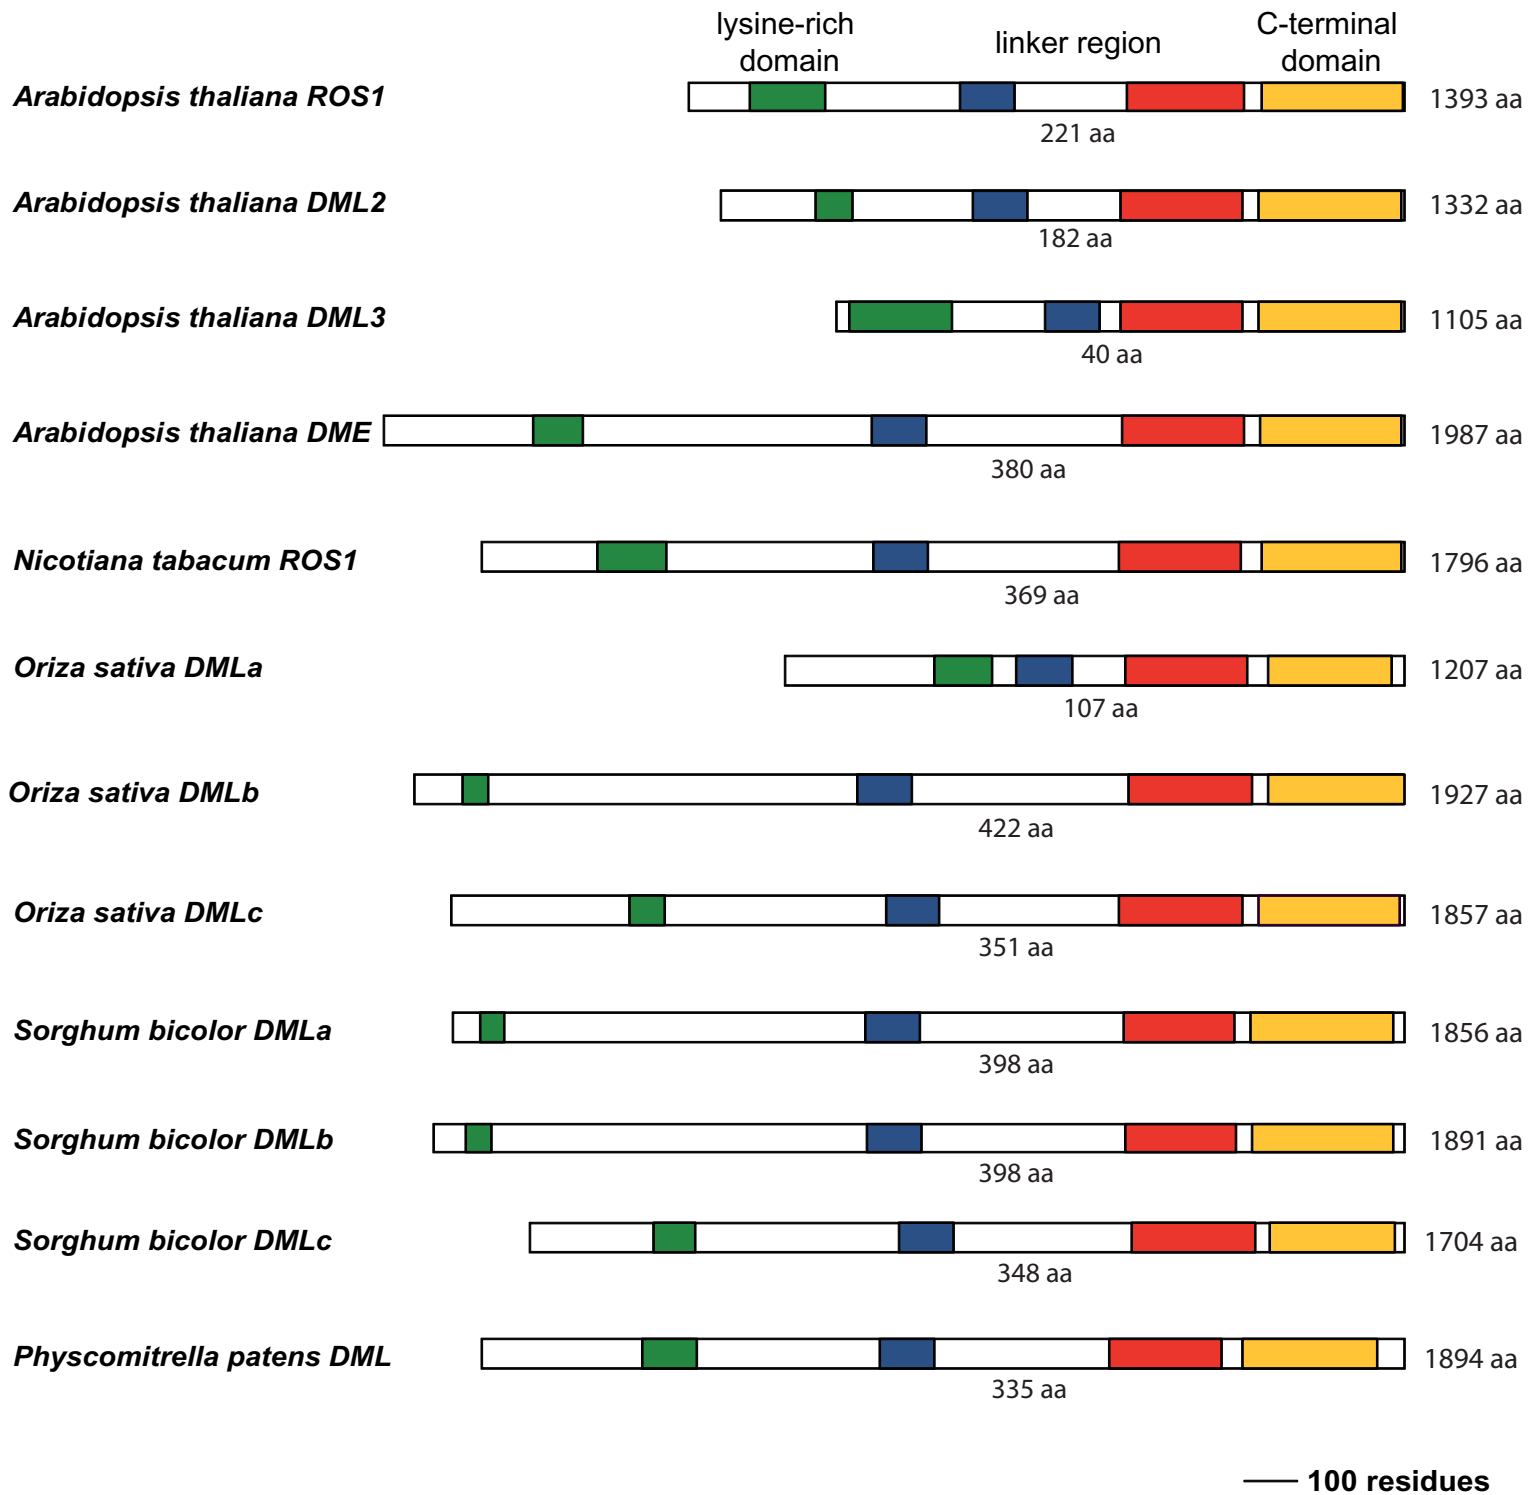

**Figure S1. Schematic alignment of members of the DML family.** Members of this subfamily of DNA glycosylases possess a lysine-rich domain (green) at the amino-terminus and a domain of unknown function unique to this class of proteins at the carboxy-terminus (yellow). Sequence similarity to HhH-GPD proteins is distributed over two non-contiguous segments (blue and red) connected by a non-conserved linker region.

**FIGURE S2**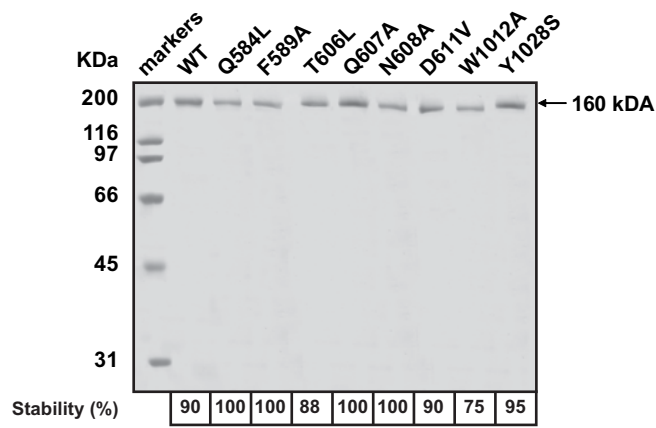

**Figure S2. SDS-PAGE analysis of wild-type and mutant ROS1 proteins.** The 10% SDS-PAGE gel was loaded with 0.4  $\mu\text{g}$  of purified protein per lane and stained with Coomassie blue. The percentage of stable protein after 4 h incubation under assay conditions (see Materials and Methods) is indicated below each lane.

**FIGURE S3**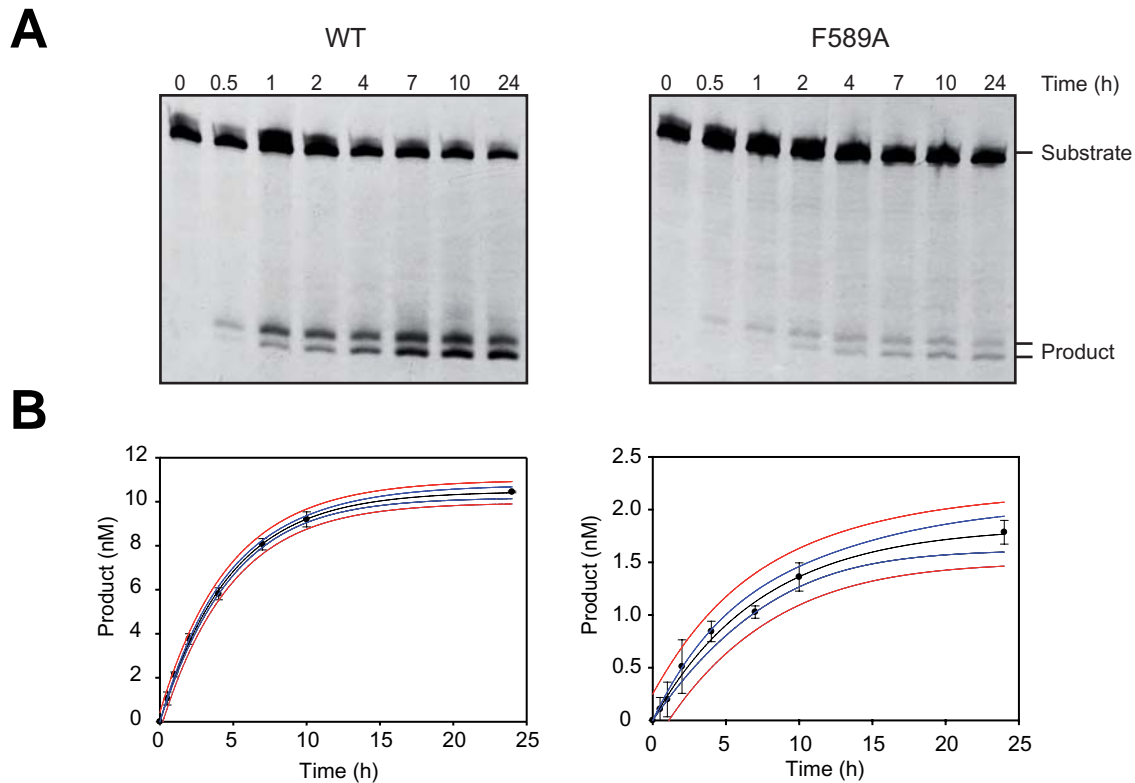

**Figure S3. Representative examples of 5-meC DNA glycosylase assay and kinetic analysis.** **A.** The time-dependent generation of incision products was measured by incubating purified WT ROS1 (left panel) or mutant variant F589A (right panel) (20 nM) at 30 °C with a 51-mer double-stranded oligonucleotide substrate (20 nM) containing a single 5-meC:G pair. Reactions were stopped at the indicated times, products were separated in a 12% denaturing polyacrylamide gel, and the amount of incised oligonucleotide was quantified by fluorescent scanning. **B.** Graphs show the generation of incision products *versus* time for WT ROS1 (left panel) and F589A mutant (right panel). Values are means  $\pm$  S.E. (error bars) from two independent experiments. Data were fitted to the equation  $[\text{Product}] = P_{\text{max}}(1 - \exp^{-kt})$  using non-linear regression analysis. Blue and red curves indicate 95% confidence and prediction intervals, respectively.

**FIGURE S4***Arabidopsis thaliana ROS1*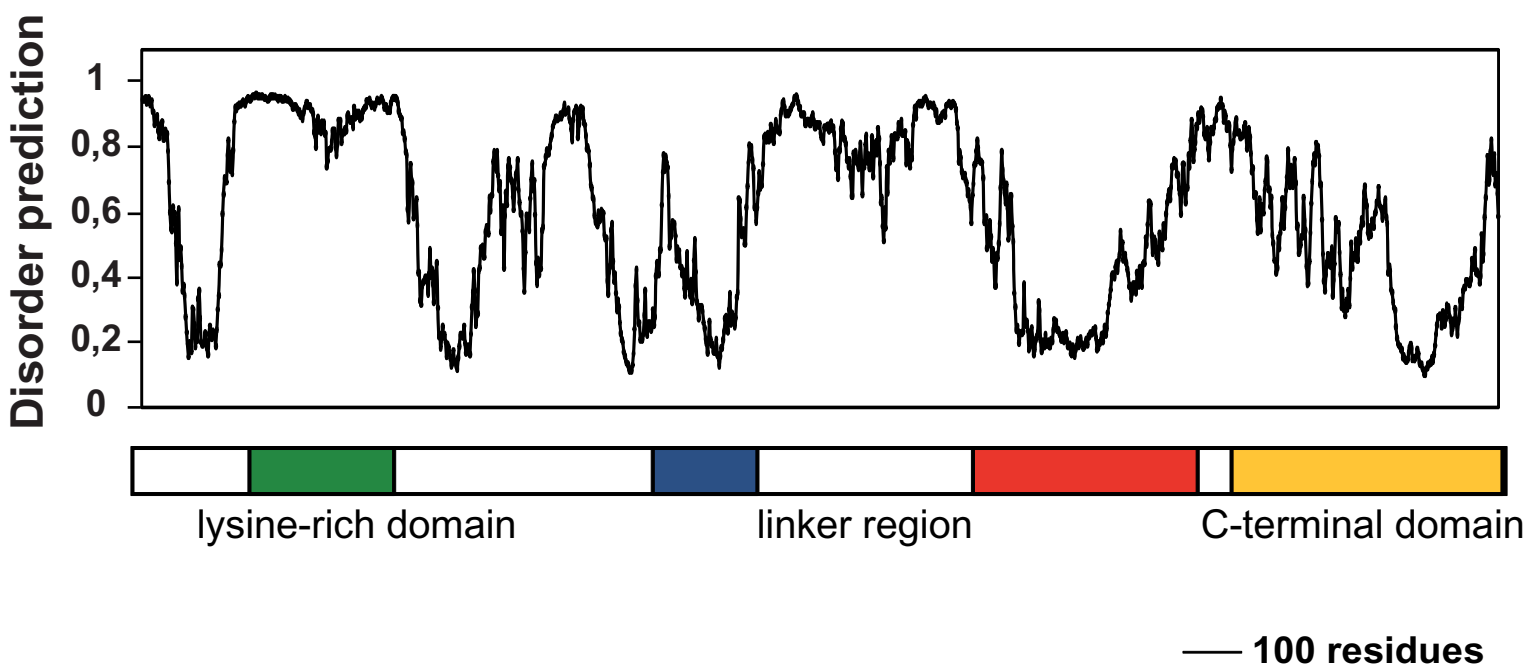

**Figure S4. Disorder prediction analysis.** Prediction of native disordered regions in the sequence of ROS1 by using the disorder-prediction program VL3H (<http://www.ist.temple.edu/disprot/Predictors.html>). Residues with a VL3H score > 0.5 are predicted to be disordered.

**FIGURE S5**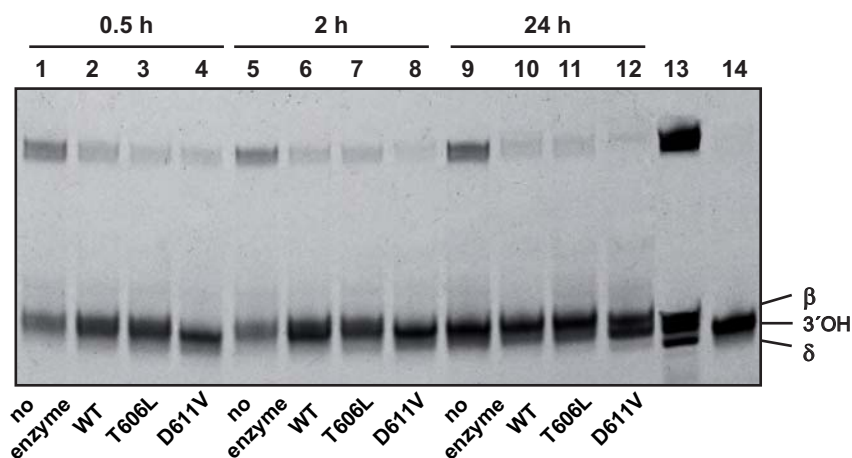

**Figure S5. AP-lyase assay.** A double-stranded oligonucleotide substrate containing an AP site opposite G (200 nM) was incubated at 30°C either in the absence of enzyme (lanes 1, 5 and 9), or in the presence of 100 nM purified WT ROS1 (lanes 2, 6 and 10), T606L (lanes 3, 7 and 11) or D611V (lanes 4, 8 and 12). Reactions were stopped at the indicated times, products were separated in a 12% denaturing polyacrylamide gel and the amount of incised oligonucleotide was quantified by fluorescent scanning. Lane 13: control reaction of a 5-meC:G substrate (20 nM) incubated with WT ROS1 (20 nM) at 30 °C for 3 h. Lane 14: control reaction of the AP-site substrate (100 nM) incubated with APE I (5 U) for 1 h. The β- and δ-elimination products and those carrying a 3'-OH terminus are indicated by arrows.



## FIGURE S6

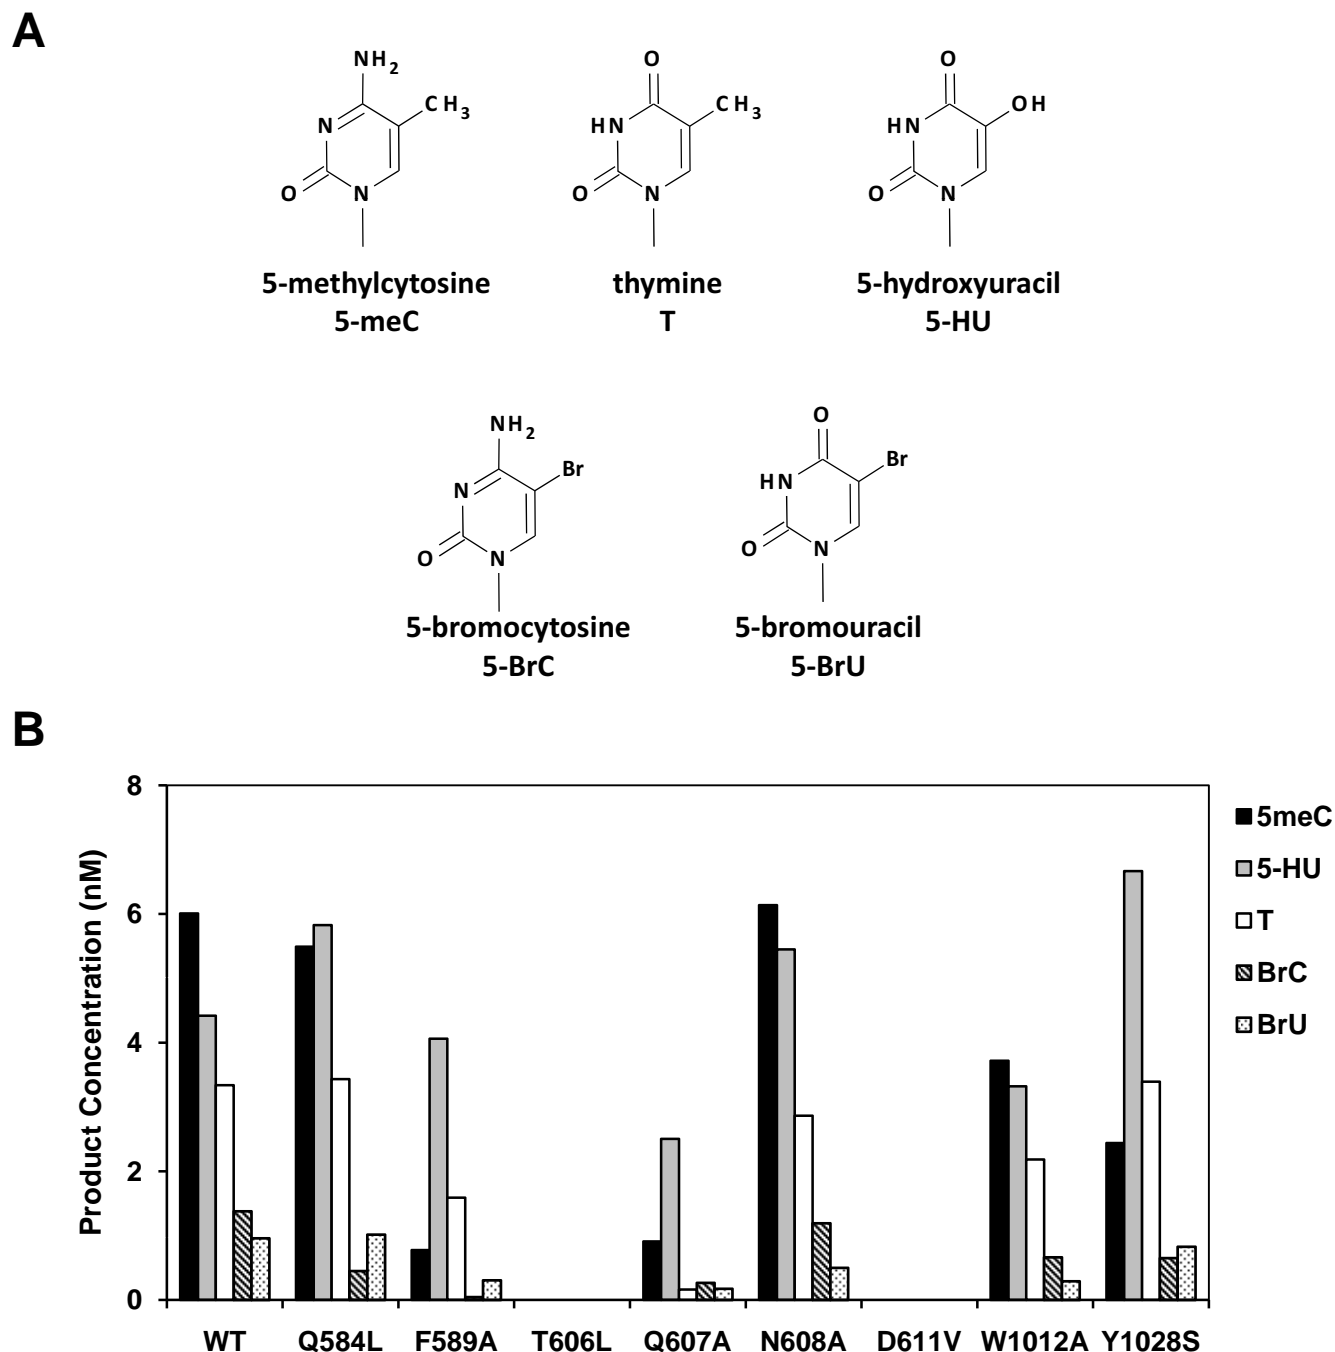

**Figure S6. Incision activity of wild type ROS1 and mutant variants on duplex DNA substrates containing different modified bases.** (A) Chemical structures of substrate DNA bases tested. (B) Purified WT ROS1 or mutant variants (20 nM) were incubated at 30°C for 4 h with 51-mer double-stranded oligonucleotide substrates (20 nM) containing at position 29 of the labeled upper-strand different target DNA bases paired with G. Products were separated in a 12% denaturing polyacrylamide gel and the amount of incised oligonucleotide was quantified by fluorescent scanning.

## FIGURE S7

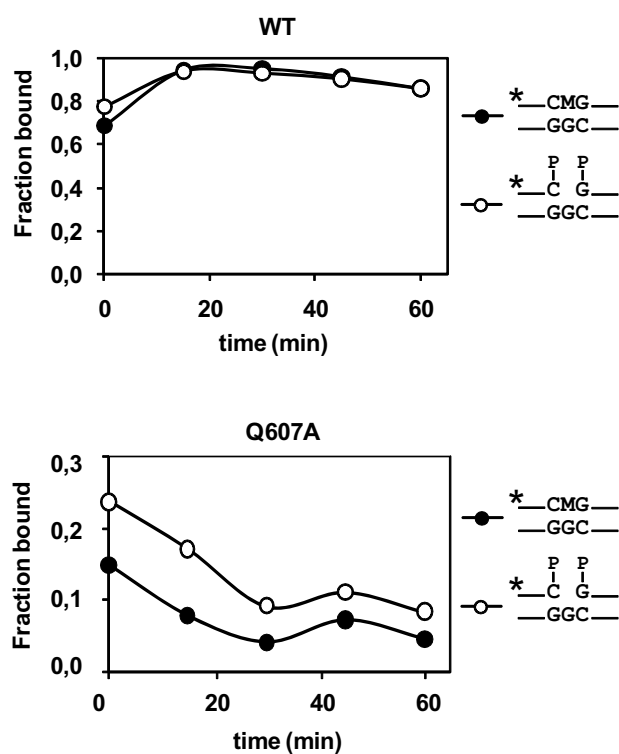

**Figure S7. Q607 is required for stable ROS1 binding to substrate and product DNA.** Fraction of 5-meC:G substrate or 1-nt gapped product bound by WT ROS1 or Q607A proteins at different incubation times. Data are from the gel shown in Figure 5.
